# Supplementary material for: Differential allosteric modulation within dopamine D2R - neurotensin NTS1R and D2R - serotonin 5-HT2AR receptor complexes gives bias to intracellular calcium signalling
Source: PubMed Central journal article supplement (PMC6841725; doi:10.1038/s41598-019-52540-8), 2019-11-08
Supplement: 41598_2019_52540_MOESM1_ESM.pdf [file 41598_2019_52540_MOESM1_ESM.pdf]

**Differential allosteric modulation within dopamine D<sub>2</sub>R - neurotensin NTS1R and  
D<sub>2</sub>R - serotonin 5-HT<sub>2A</sub>R receptor complexes gives bias to intracellular calcium  
signalling**

Michael Plach<sup>1‡</sup>, Thorsten Schäfer<sup>1‡</sup>, Dasiel Oscar Borroto-Escuela<sup>2</sup>, Dorothee Weikert<sup>3</sup>, Peter  
Gmeiner<sup>3</sup>, Kjell Fuxe<sup>2</sup>, Kristina Friedland<sup>1,4\*</sup>

<sup>1</sup>Department of Chemistry and Pharmacy, Molecular and Clinical Pharmacy, Friedrich-Alexander-Universität Erlangen-Nürnberg (FAU), Erlangen, Germany

<sup>2</sup>Department of Neuroscience, Karolinska Institutet, Stockholm, Sweden

<sup>3</sup>Department of Chemistry and Pharmacy, Medicinal Chemistry, Friedrich-Alexander-Universität Erlangen-Nürnberg (FAU), Erlangen, Germany

<sup>4</sup>Department of Pharmacology and Toxicology, Institute of Pharmacy and Biochemistry, Johannes-Gutenberg-Universität, Mainz, Germany

‡ These authors contributed equally.

\* Corresponding author: Kristina Friedland, Staudingerweg 5, 55128 Mainz, Germany, +49 6131

3924308, kfriedla@uni-mainz.de

## Supplementary Figures

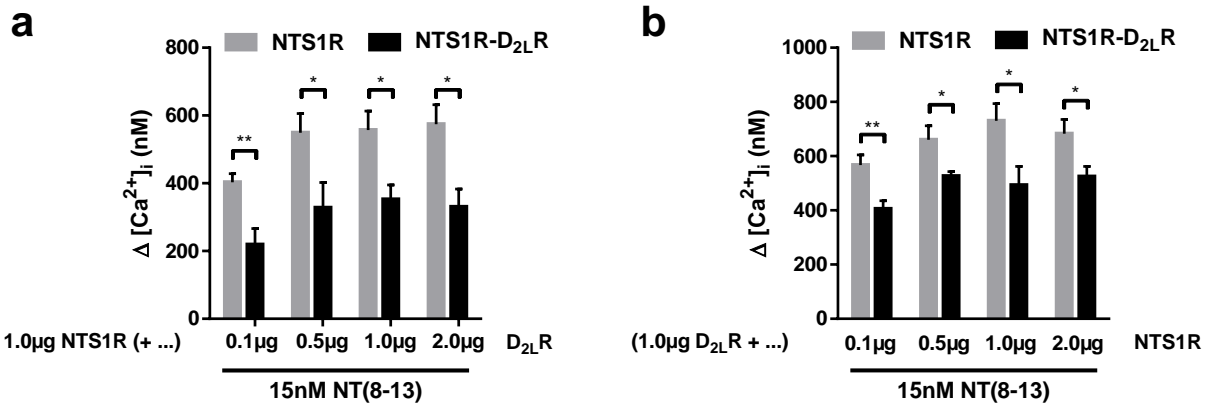

**Supplementary Figure S1: Varying amounts of cDNA do not effect NTS1R-D<sub>2L</sub>R mediated intracellular calcium in HT22 cells.** (a) NT(8-13) stimulation of HT22 cells, transiently co-transfected with 0.1 µg – 2.0 µg of D<sub>2L</sub>R cDNA and a constant amount of 1.0 µg NTS1R, led to a significantly lowered intracellular calcium response compared to NTS1R mono-expressing cells in all of the tested cDNA ratios. (b) Comparably, variation of NTS1R cDNA amounts resulted in markedly reduced calcium signals for co-expressing cells, covering a range between 0.1 µg and 2.0 µg for NTS1R and 1.0 µg for D<sub>2L</sub>R. Data were analyzed with student's t-test and presented as mean ± SEM, n = 6, performed in hexaplicates. \* p < 0.05, \*\* p < 0.01.

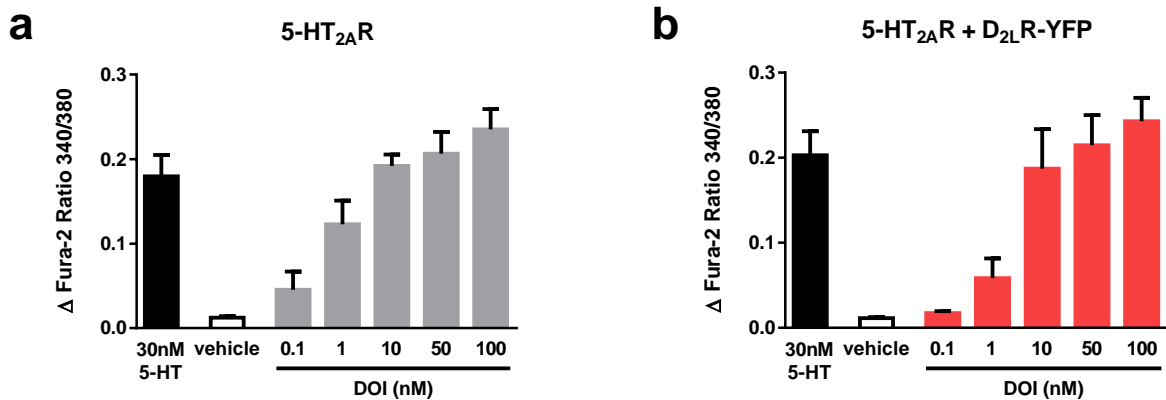

**Supplementary Figure S2: Dose-response curves of DOI induced intracellular calcium in HT22 cells.** (a) 5-HT<sub>2A</sub>R mono-transfected cells stimulated with 30 nM 5-HT as a positive reference, vehicle (HBSS) as a negative control and rising concentrations of 5-HT<sub>2A</sub>R agonist DOI (0.1 – 100 nM) led to a dose-dependent increase of ΔFura-2 ratio, representing the change in intracellularly released calcium. Concentrations above 10 nM approach a maximum response. (b) Cells co-expressing 5-HT<sub>2A</sub>R and D<sub>2</sub>R showed a comparable dose-response profile with highly similar absolute values. Vehicle was deduced by ratio calculations before addition of the ligands.

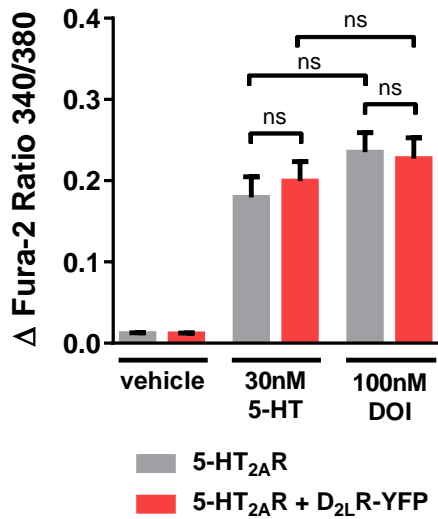

**Supplementary Figure S3: 5-HT and DOI mediated calcium signals do not differ.** Highly similar calcium release was obtained in mono- and co-expressing HT22 cells, independent of the 5-HT<sub>2A</sub>R activating ligand. Vehicle treatment (HBSS) was determined by calculation of the ratio before addition of ligands. Experiments were performed in triplicates, data analyzed with student's t-test and presented as mean ± SEM, n = 6-7, ns = non-significant.

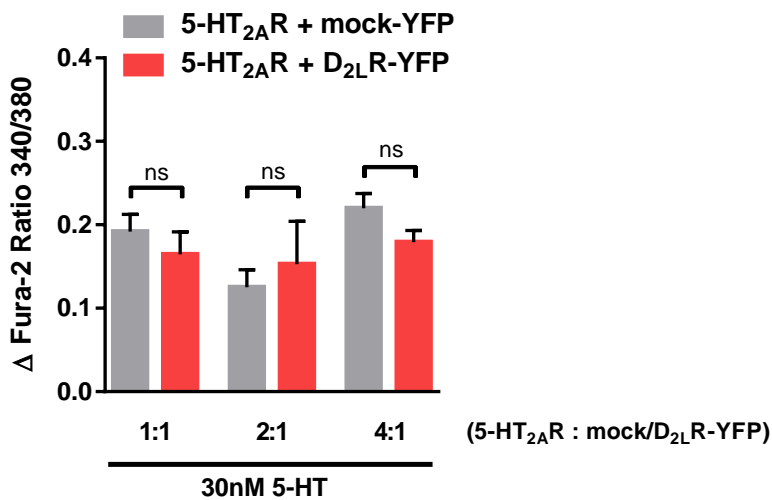

**Supplementary Figure S4: Alteration of 5-HT<sub>2A</sub>R/D<sub>2L</sub>R ratio does not change 5-HT provoked calcium response in HT22 cells.** Neither equimolar amounts (1:1), nor 2- or 4-fold excess of 5-HT<sub>2A</sub>R towards D<sub>2L</sub>R or mock cDNA changed intracellular calcium signalling significantly ( $p > 0.05$ ), since for all tested cDNA ratios responses were highly comparable for mono- and co-transfected cells. Data were analyzed with student's t-test and presented as mean ± SEM, n = 3-6, performed in hexaplicates, ns = non-significant.
